# Supplementary material for: Hypoxic Respiratory Chemoreflex Control in Young Trained Swimmers
Source: PubMed Central journal article supplement (PMC7953139; doi:10.3389/fphys.2021.632603), 2021-02-26
Supplement: Table_1.pdf [file Table_1.pdf]

## Supplemental Material

### HYPOXIC RESPIRATORY CHEMOREFLEX CONTROL IN YOUNG TRAINED SWIMMERS

Alexis Arce-Álvarez<sup>1</sup>, Carlos Veliz<sup>2</sup>, Manuel Vazquez-Muñoz<sup>3,4</sup>, Magdalena von Igel<sup>2</sup>,  
Cristian Alvarez-Lepín<sup>5</sup>, Rodrigo Ramirez-Campillo<sup>5</sup>, Mikel Izquierdo<sup>3</sup>, Gregoire P. Millet<sup>6</sup>,  
Rodrigo Del Rio<sup>7,8,9</sup>, \*David C. Andrade<sup>2,7,10</sup>

<sup>1</sup>Escuela de Kinesiología, Facultad de Salud, Universidad Católica Silva Henríquez, Santiago, Chile. <sup>2</sup>Centro de Investigación en Fisiología del Ejercicio, Facultad de Ciencias, Universidad Mayor, Santiago, Chile. <sup>3</sup>Navarrabiomed, Complejo Hospitalario de Navarra (CHN), Universidad Pública de Navarra (UPNA), IdiSNA, Pamplona, Navarra, Spain. <sup>4</sup>Unidad de Estadística, Departamento de Calidad, Clínica Santa María, Santiago, Chile. <sup>5</sup>Laboratory of Human Performance, Quality of Life and Wellness Research Group, Department of Physical Activity Sciences, Universidad de Los Lagos, Osorno, Chile. <sup>6</sup>Institute of Sport Sciences, University of Lausanne, CH-1015, Lausanne, Switzerland. <sup>7</sup>Laboratory of Cardiorespiratory Control, Department of Physiology, Pontificia Universidad Católica de Chile, Santiago, Chile. <sup>8</sup>Centro de Envejecimiento y Regeneración (CARE), Pontificia Universidad Católica de Chile, Santiago, Chile. <sup>9</sup>Centro de Excelencia en Biomedicina de Magallanes (CEBIMA), Universidad de Magallanes, Punta Arenas, Chile. <sup>10</sup>Centro de Fisiología y Medicina de Altura, Facultad de Ciencias de la Salud, Universidad de Antofagasta, Antofagasta, Chile

**Running Head:** Respiratory chemoreflex in swimmers

\*Corresponding author: David C. Andrade, Ph.D.  
Laboratory of Cardiorespiratory Control  
Pontificia Universidad Católica de Chile.  
Centro de Fisiología y Medicina de Altura  
Facultad de Ciencias de la Salud, Universidad de Antofagasta  
Antofagasta, Chile.  
Tel: +569 88928666  
E-mail: [dcandrade@uc.cl](mailto:dcandrade@uc.cl)  
[david.andrade@uantof.cl](mailto:david.andrade@uantof.cl)

## SUPPLEMENTARY TABLES.

Supplementary table 1. Baseline ventilatory function and metabolic parameters in swimmers and control participants.

| <b>Ventilatory</b>       | <b>Swimmers (n=15)</b> | <b>Control (n=27)</b> |
|--------------------------|------------------------|-----------------------|
| FVC (L)                  | 4.90 ± 1.23            | 4.96 ± 0.91           |
| PEF (L/s)                | 7.70 ± 1.92            | 7.91 ± 1.54           |
| FEV1 (L)                 | 3.98 ± 0.84            | 4.12 ± 0.7            |
| FEV1/VC (%)              | 81.93 ± 5.14           | 83.25 ± 4.8           |
| FEF25 (L/s)              | 2.01 ± 0.45            | 2.30 ± 0.66           |
| FEF50 (L/s)              | 4.65 ± 1.0             | 4.68 ± 1.23           |
| FEF75 (L/s)              | 6.78 ± 1.94            | 6.72 ± 1.44           |
| <b>Metabolic</b>         |                        |                       |
| Fat (%)                  | 62.40 ± 19.59          | 53.74 ± 18.16         |
| Carbohydrates (%)        | 41.49 ± 25.39          | 46.26 ± 18.16         |
| Protein (%)              | 0.00 ± 0.00            | 0.00 ± 0.00           |
| Fat (kcal/day)           | 1419.19 ± 565.46       | 1218.63 ± 416.48      |
| Carbohydrates (kcal/day) | 840.58 ± 408.37        | 1052.14 ± 436.54      |
| Protein (kcal/day)       | 0.00 ± 0.00            | 0.00 ± 0.00           |

Values are means ± SD. Data with parametric distribution was analyzed using T-test. Data with non-parametric distribution was analyzed using Mann–Whitney test. **FVC**: forced expiratory vital capacity; **PEF**: peak expiratory flow; **FEV1**: forced expiratory volume in one second; **FEF25**, **MEF 25**, **MEF 50**, and **MEF 75**: mean expiratory flow at 25%, 50%, and 75% of vital capacity, respectively; **VC**: vital capacity. No significant differences were observed between groups.

**Supplementary Table 2.** Autonomic response to severe hypoxic challenge in swimmer and control participants.

|                                | Swimmers (n=15)   |                    | Control (n=27)    |                   | Swimmers           | Control            |
|--------------------------------|-------------------|--------------------|-------------------|-------------------|--------------------|--------------------|
|                                | Normoxia          | Hypoxia            | Normoxia          | Hypoxia           | Δ Normoxia-Hypoxia | Δ Normoxia-Hypoxia |
| Total Power (ms <sup>2</sup> ) | 6916.25 ± 6118.49 | 5559.67 ± 5910.83  | 7423.24 ± 7236.59 | 5933.25 ± 6753.61 | -1356.57 ± 4191.38 | -1489.99 ± 8115.13 |
| VLF (ms <sup>2</sup> )         | 1433.52 ± 1123.52 | 574.02 ± 1026.24 * | 1364.78 ± 1480.26 | 675.98 ± 760.83 * | -859.50 ± 1452.17  | -688.79 ± 1492.61  |
| LF (ms <sup>2</sup> )          | 910.36 ± 686.34   | 631.99 ± 613.88    | 626.47 ± 573.18   | 633.76 ± 715.52   | -278.37 ± 816.84   | 7.29 ± 862.69      |
| HF (ms <sup>2</sup> )          | 4373.06 ± 4564.98 | 4227.5 ± 5069.35   | 5018.81 ± 6048.47 | 4130.23 ± 5453.42 | -145.81 ± 3000.77  | -888.59 ± 7026.54  |
| SDNN (ms)                      | 74.11 ± 36.68     | 76.39 ± 40.88      | 110.31 ± 169.95   | 71.53 ± 34.62     | 2.29 ± 23.03       | -38.78 ± 182.19    |
| RMSSD (ms)                     | 65.74 ± 46.25     | 64.73 ± 50.0       | 80.78 ± 49.45     | 71.63 ± 43.59     | -1.01 ± 28.58      | -9.15 ± 44.03      |
| PNN50 (%)                      | 32.68 ± 26.78     | 30.66 ± 29.43      | 45.58 ± 24.3      | 42.42 ± 24.12     | -2.02 ± 13.91      | -3.16 ± 18.35      |
| SD1 (ms)                       | 46.50 ± 32.7      | 46.18 ± 35.81      | 57.15 ± 35.0      | 51.18 ± 31.14     | -0.32 ± 20.41      | -5.97 ± 31.27      |
| SD2 (ms)                       | 93.05 ± 42.43     | 96.55 ± 47.99      | 90.11 ± 43.52     | 85.58 ± 41.53     | 3.50 ± 28.24       | -4.53 ± 38.95      |
| SD2/SD1                        | 2.45 ± 0.81       | 1.87 ± 0.79        | 2.53 ± 0.91       | 2.01 ± 1.07       | -0.07 ± 0.7        | 0.15 ± 0.75        |

Values are means ± SD. **VLF**, very low frequency of HRV; **LF**, low frequency component of HRV; **HF**, High frequency component of HRV; **SDNN**, Standard deviation of the NN intervals; **RMSSD**, Root mean square of the successive differences between adjacent normal R-R intervals; **PNN50**, proportion of NN50 divided by the total number of NN intervals; **SD1**, short-term variability of NN intervals; **SD2**, long-term variability of NN intervals. Unpaired T-Test for parametric variables (LF (%), HF (%), PNN50, ) and U-Mann Whitney Test for non-parametric variables (Total Power, VLF, LF, LF (n.u.), HF, HF (n.u.), LF/HF, SDNN, RMSSD, SD1, SD2, SD2/SD1) was performed to compare ΔNormoxia-Hypoxia. Two-way ANOVA with repeated measures followed by Holm-Sidak post-hoc test was performed. \*, P<0.05 vs Normoxia; + P<0.05 vs Controls.
